# Supplementary material for: Mycobacterium tuberculosis thymidylate synthase (ThyX) is a target for plumbagin, a natural product with antimycobacterial activity
Source: PubMed Central journal article supplement (PMC6999906; doi:10.1371/journal.pone.0228657), 2020-02-04
Supplement: pone.0228657.s001.pdf [file pone.0228657.s001.pdf]

**FIG S1**

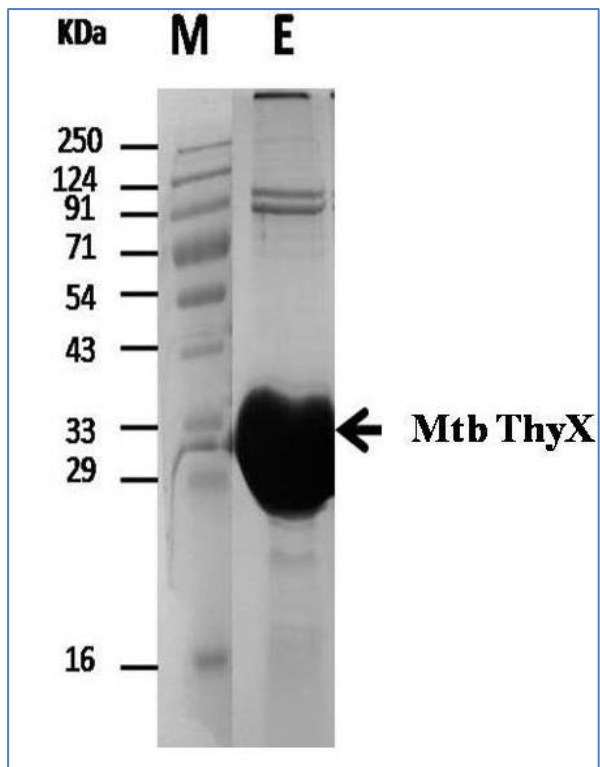

**Figure S1.** 12% SDS-PAGE analysis of purified hexa-histidine tagged Mtb ThyX protein under native condition.
