# Supplementary material for: Mycobacterium tuberculosis thymidylate synthase (ThyX) is a target for plumbagin, a natural product with antimycobacterial activity
Source: PubMed Central journal article supplement (PMC6999906; doi:10.1371/journal.pone.0228657), 2020-02-04
Supplement: pone.0228657.s005.pdf [file pone.0228657.s005.pdf]

FIG S5

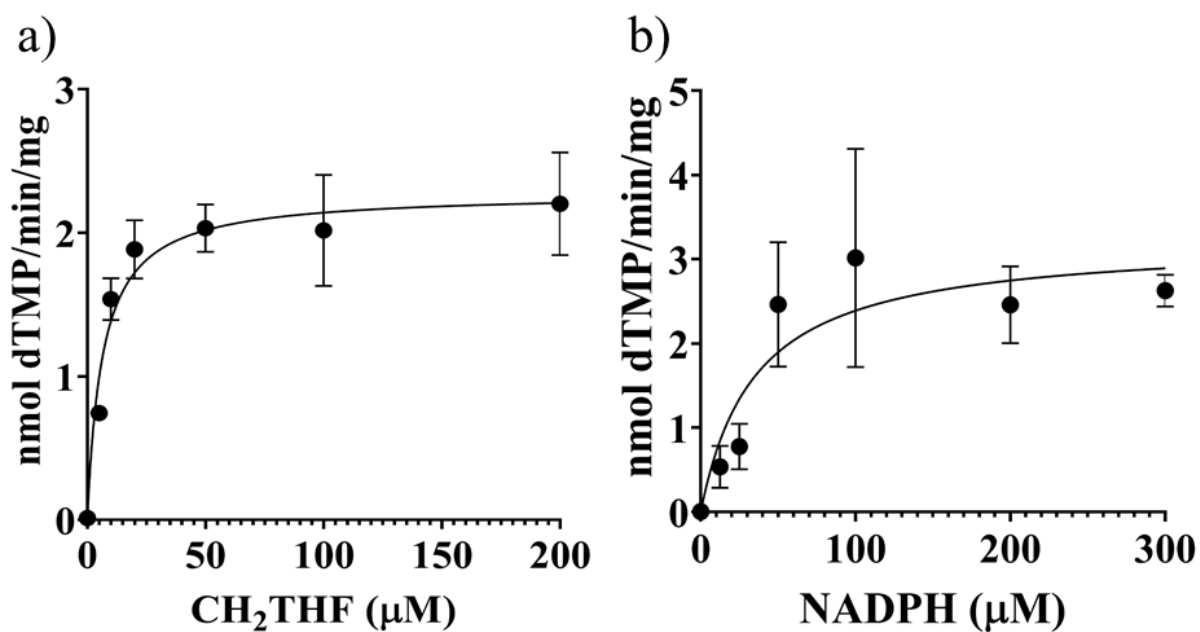

**Fig. S5.** Substrate saturation experiments of methylenetetrahydrofolate and NADPH, were performed using tritium release assay. Curve fitting and derivation of  $K_m$  and  $V_{max}$  were done using the Michelis-Menten equation with the help of GraphPad Prism software. The concentrations at which these co-substrates NADPH and methylenetetrahydrofolate support half maximal velocity ( $K_m$ ) are 35.22 and 6  $\mu$ M respectively.
