# Supplementary material for: Mycobacterium tuberculosis thymidylate synthase (ThyX) is a target for plumbagin, a natural product with antimycobacterial activity
Source: PubMed Central journal article supplement (PMC6999906; doi:10.1371/journal.pone.0228657), 2020-02-04
Supplement: pone.0228657.s007.pdf [file pone.0228657.s007.pdf]

Table S1. Viable counts following plumbagin (PG) treatment of Msm cells expressing either no gene (empty vector) or Mtb thyX (with or without induction).

| PG( $\mu\text{g/ml}$ ) | CFUs/ml         |                 |                 |                  |                 |                 |                 |                 |                 |
|------------------------|-----------------|-----------------|-----------------|------------------|-----------------|-----------------|-----------------|-----------------|-----------------|
|                        | Empty Vector    |                 |                 | Uninduced        |                 |                 | Induced         |                 |                 |
|                        | 1               | 2               | 3               | 1                | 2               | 3               | 1               | 2               | 3               |
| 0                      | 941 x<br>$10^6$ | 600 x<br>$10^6$ | 263 x<br>$10^6$ | 1021 x<br>$10^6$ | 650 x<br>$10^6$ | 363 x<br>$10^6$ | 532 x<br>$10^6$ | 200 x<br>$10^6$ | 186 x<br>$10^6$ |
| 5                      | 676 x<br>$10^6$ | 700 x<br>$10^6$ | 195 x<br>$10^6$ | 5220 x<br>$10^5$ | 166 x<br>$10^6$ | 242 x<br>$10^6$ | 431 x<br>$10^6$ | 101 x<br>$10^6$ | 120 x<br>$10^6$ |
| 10                     | 310 x<br>$10^6$ | 223 x<br>$10^6$ | 200 x<br>$10^4$ | 1356 x<br>$10^5$ | 65 x $10^6$     | <1 x<br>$10^3$  | 450 x<br>$10^6$ | 98 x<br>$10^6$  | 57 x<br>$10^6$  |
| 15                     | <1 x<br>$10^3$  | 450 x<br>$10^2$ | <1 x<br>$10^3$  | 570 x<br>$10^2$  | 86 x<br>$10^3$  | <1 x<br>$10^3$  | 94 x<br>$10^6$  | 56 x<br>$10^6$  | 43 x<br>$10^6$  |
| 20                     | <1 x<br>$10^3$  | 560 x<br>$10^2$ | <1 x<br>$10^3$  | 196 x<br>$10^3$  | 18 x<br>$10^3$  | <1 x<br>$10^3$  | 44 x<br>$10^6$  | 16 x<br>$10^6$  | 34 x<br>$10^6$  |
| 25                     | <1 x<br>$10^3$  | 103 x<br>$10^3$ | <1 x<br>$10^3$  | $1 \times 10^3$  | <1 x<br>$10^3$  | <1 x<br>$10^3$  | 74 x<br>$10^6$  | 13 x<br>$10^4$  | 11 x<br>$10^6$  |
